# Supplementary material
Source: Research Square preprint supplement (doi:10.21203/rs.3.rs-9531025/v1)

**Additional file 1**

*Cost of one BG-Sentinel 2 trap compared to one HLC team of two collectors.*

One CO2 tank can last reliably for 5 collection nights when set at a standard CO2 release rate of 250 mL/min. The formula to calculate the cost of using a mechanical trap baited with CO2 is

1. .

| **Method** | **Establishment costs** | **Nightly running costs** |
| --- | --- | --- |
| BG-Sentinel 2 | AU$ 150 |  |
| CO2 tank (incl. 1 gas fill) | IDR 2,000,000 (AU$ 200) |  |
| Refill of CO2 tank | IDR 400,000 (AU$ 40) | IDR 80,000 (AU$ 8) |
| HLC (per collector) |  | IDR 150,000 (AU$ 15) |


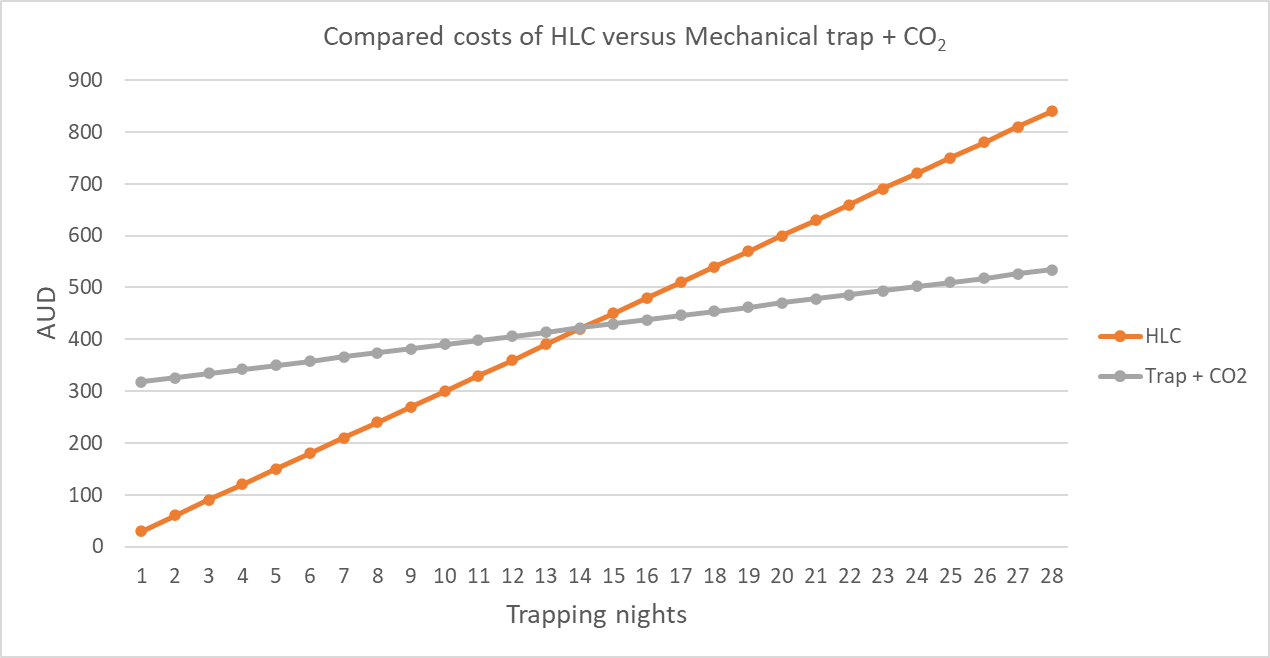

Supplement: Supplementary file 1 [file 2d4eaa863aee5508609646f3.docx]
